# Supplementary material for: Assessment of the Nutritional Status of Four Selected Rural Communities in KwaZulu-Natal, South Africa
Source: MDPI journal article supplement (doi:10.3390/nu13092920), 2021-08-24
Supplement: s1 [file s1]

**Table S1.** EAR/AI values used to compare the mean nutrient intake from two 24-hour repeated recalls for individuals aged 1-18 years

| Nutrients                | 1-3 years          |                 | 4-8 years |     | 9-13 years, Female |      | 9-13 years, Male |      | 14-18 years, Female |      | 14-18 years, Male |      |
|--------------------------|--------------------|-----------------|-----------|-----|--------------------|------|------------------|------|---------------------|------|-------------------|------|
|                          | EAR <sup>a-d</sup> | AI <sup>e</sup> | EAR       | AI  | EAR                | AI   | EAR              | AI   | EAR                 | AI   | EAR               | AI   |
| <b>Total protein (g)</b> | 11                 | -               | 15        | -   | 28                 | -    | 27               | -    | 28                  | -    | 44                | -    |
| <b>Carbohydrates (g)</b> | 100                | -               | 100       | -   | 100                | -    | 100              | -    | 100                 | -    | 100               | -    |
| <b>Dietary fibre (g)</b> | 19                 | -               | 25        | -   | 26                 | -    | 31               | -    | 26                  | -    | 38                | -    |
| <b>Calcium (mg)</b>      |                    | 500             |           | 800 | -                  | 1300 |                  | 1300 | -                   | 1300 | -                 | 1300 |
| <b>Magnesium (mg)</b>    | 65                 | -               | 110       | -   | 200                | -    | 200              | -    | 300                 | -    | 340               | -    |
| <b>Phosphorus (mg)</b>   | 380                | -               | 405       | -   | 1055               | -    | 1055             | -    | 1055                | -    | 1055              | -    |
| <b>Iron (mg)</b>         | 3                  | -               | 4.1       | -   | 5.7                | -    | 5.9              | -    | 7.9                 | -    | 7.7               | -    |
| <b>Zinc (mg)</b>         | 2.5                | -               | 4.0       | -   | 7.0                | -    | 7.0              | -    | 7.3                 | -    | 8.5               | -    |
| <b>Thiamine (mg)</b>     | 0.4                | -               | 0.5       | -   | 0.7                | -    | 0.7              | -    | 0.9                 | -    | 1.0               | -    |
| <b>Riboflavin (mg)</b>   | 0.4                | -               | 0.5       | -   | 0.8                | -    | 0.8              | -    | 0.9                 | -    | 1.1               | -    |
| <b>Niacin (mg)</b>       | 5                  | -               | 6         | -   | 9                  | -    | 9                | -    | 11                  | -    | 12                | -    |
| <b>Vitamin B6 (mg)</b>   | 0.4                | -               | 0.5       | -   | 0.8                | -    | 0.8              | -    | 1.0                 | -    | 1.1               | -    |
| <b>Folate (µg)</b>       | 120                | -               | 160       | -   | 250                | -    | 250              | -    | 330                 | -    | 330               | -    |
| <b>Vitamin B12 (µg)</b>  | 0.7                | -               | 1         | -   | 1.5                | -    | 1.5              | -    | 1.5                 | -    | 2.0               | -    |
| <b>Vitamin C (mg)</b>    | 13                 | -               | 22        | -   | 39                 | -    | 39               | -    | 56                  | -    | 63                | -    |
| <b>Vitamin A (µg)</b>    | 210                | -               | 275       | -   | 420                | -    | 445              | -    | 485                 | -    | 630               | -    |
| <b>Vitamin D (µg)</b>    | -                  | 5.0             |           | 5.0 | -                  | 5.0  |                  | 5.0  | -                   | 5.0  | -                 | 5.0  |
| <b>Vitamin E (mg)</b>    | 5                  | -               | 6         | -   | 9                  | -    | 9                | -    | 12                  | -    | 12                | -    |
| <b>Vitamin K (µg)</b>    | 30                 | -               | 55        | -   | 60                 | -    | 60               | -    | 75                  | -    | 75                | -    |

<sup>a</sup> Institute of Medicine 2003; <sup>b</sup>Institute of Medicine 2001b; <sup>c</sup>Institute of Medicine 2000; <sup>d</sup>Institute of Medicine 1998; <sup>e</sup>Institute of Medicine 1997; SD, standard deviation; EAR, estimated average requirement; AI, adequate intake; \* p values given in bold font indicate that the mean nutrient intake is significantly different from the EAR/AI.

**Table S2.** EAR/AI values used to compare the mean nutrient intake from two 24-hour repeated recalls for individuals aged 19-70 years

| Nutrients         | 19-30 years, Female |                 | 19-30 years, Male |      | 31-50 years, Female |      | 31-50 years, Male |      | 51-70 years, Female |      | 51-70 years, Male |      |
|-------------------|---------------------|-----------------|-------------------|------|---------------------|------|-------------------|------|---------------------|------|-------------------|------|
|                   | EAR <sup>a-d</sup>  | AI <sup>e</sup> | EAR               | AI   | EAR                 | AI   | EAR               | AI   | EAR                 | AI   | EAR               | AI   |
| Total protein (g) | 38                  | -               | 46                | -    | 38                  | -    | 46                | -    | 38                  | -    | 46                | -    |
| Carbohydrates (g) | 100                 | -               | 100               | -    | 100                 | -    | 100               | -    | 100                 | -    | 100               | -    |
| Dietary fibre (g) | 25                  | -               | 38                | -    | 25                  | -    | 38                | -    | 25                  | -    | 38                | -    |
| Calcium (mg)      | -                   | 1000            | -                 | 1000 | -                   | 1000 | -                 | 1000 | -                   | 1000 | -                 | 1000 |
| Magnesium (mg)    | 255                 | -               | 330               | -    | 265                 | -    | 350               | -    | 255                 | -    | 330               | -    |
| Phosphorus (mg)   | 580                 | -               | 580               | -    | 580                 | -    | 580               | -    | 580                 | -    | 580               | -    |
| Iron (mg)         | 8.1                 | -               | 6                 | -    | 8.1                 | -    | 6                 | -    | 8.1                 | -    | 6                 | -    |
| Zinc (mg)         | 6.8                 | -               | 9.4               | -    | 6.8                 | -    | 9.4               | -    | 6.8                 | -    | 9.4               | -    |
| Thiamine (mg)     | 0.9                 | -               | 1.0               | -    | 0.9                 | -    | 1.0               | -    | 0.9                 | -    | 1.0               | -    |
| Riboflavin (mg)   | 0.9                 | -               | 1.1               | -    | 0.9                 | -    | 1.1               | -    | 0.9                 | -    | 1.1               | -    |
| Niacin (mg)       | 11                  | -               | 12                | -    | 11                  | -    | 12                | -    | 11                  | -    | 12                | -    |
| Vitamin B6 (mg)   | 1.1                 | -               | 1.1               | -    | 1.1                 | -    | 1.1               | -    | 1.1                 | -    | 1.1               | -    |
| Folate (µg)       | 320                 | -               | 320               | -    | 320                 | -    | 320               | -    | 320                 | -    | 320               | -    |
| Vitamin B12 (µg)  | 2.0                 | -               | 2.0               | -    | 2.0                 | -    | 2.0               | -    | 2.0                 | -    | 2.0               | -    |
| Vitamin C (mg)    | 60                  | -               | 75                | -    | 60                  | -    | 75                | -    | 60                  | -    | 75                | -    |
| Vitamin A (µg)    | 500                 | -               | 625               | -    | 500                 | -    | 625               | -    | 500                 | -    | 625               | -    |
| Vitamin D (µg)    | -                   | 5.0             | -                 | 5.0  | -                   | 5.0  | -                 | 5.0  | -                   | 10   | -                 | 10   |
| Vitamin E (mg)    | 12                  | -               | 12                | -    | 12                  | -    | 12                | -    | 12                  | -    | 12                | -    |
| Vitamin K (µg)    | 90                  | -               | 120               | -    | 90                  | -    | 120               | -    | 90                  | -    | 120               | -    |

<sup>a</sup> Institute of Medicine 2003; <sup>b</sup>Institute of Medicine 2001b; <sup>c</sup>Institute of Medicine 2000; <sup>d</sup>Institute of Medicine 1998; <sup>e</sup>Institute of Medicine 1997; SD, standard deviation; EAR, estimated average requirement; AI, adequate intake; \* p values given in bold font indicate that the mean nutrient intake is significantly different from the EAR/AI.

**Table S3.** The prevalence of adequate and inadequate nutrient intake for each age and gender group

| Age group (yrs) | n  | Gender          | Nutrients with adequate intake                                                                                                                                     |
|-----------------|----|-----------------|--------------------------------------------------------------------------------------------------------------------------------------------------------------------|
| 1-3             | 16 | Male and female | Protein, carbohydrates, magnesium, phosphorus, iron, zinc, thiamine, vitamin B6, B12 and C.                                                                        |
| 4-8             | 59 | Male and female | Protein, carbohydrates, magnesium, phosphorus, iron, thiamine, niacin and vitamin B6.                                                                              |
| 9-13            | 37 | Female          | Protein, carbohydrates, iron, thiamine, niacin, vitamin B6 and B12.                                                                                                |
| 9-13            | 14 | Male            | Protein, carbohydrates, magnesium, iron, thiamine, vitamin B6 and B12.                                                                                             |
| 14-18           | 32 | Female          | Protein, carbohydrate, vitamin B6 and B12.                                                                                                                         |
| 14-18           | 18 | Male            | Carbohydrates                                                                                                                                                      |
| 19-30           | 67 | Female          | Protein, carbohydrates, phosphorus and niacin.                                                                                                                     |
| 19-30           | 43 | Male            | Protein, carbohydrates, phosphorous and iron.                                                                                                                      |
| 31-50           | 62 | Female          | Protein, carbohydrates, phosphorus, zinc, thiamine and niacin.                                                                                                     |
| 31-50           | 32 | Male            | Protein, carbohydrates, iron and niacin.                                                                                                                           |
| 51-70           | 51 | Female          | Carbohydrates and phosphorus.                                                                                                                                      |
| 51-70           | 20 | Male            | Protein, carbohydrates, magnesium and niacin.                                                                                                                      |
| Above 70        | 10 | Female          | Protein, carbohydrates, phosphorus and vitamin K.                                                                                                                  |
| Above 70        | 5  | Male            | Carbohydrates, phosphorus and niacin.                                                                                                                              |
| Age group (yrs) | n  | Gender          | Nutrients with inadequate intake                                                                                                                                   |
| 1-3             | 16 | Male and female | Dietary fibre, riboflavin, niacin, folate, vitamins A, E and K.                                                                                                    |
| 4-8             | 59 | Male and female | Dietary fibre, zinc, riboflavin, folate, vitamins B <sub>12</sub> , vitamin C, A, E and K.                                                                         |
| 9-13            | 37 | Female          | Dietary fibre, magnesium, phosphorous, zinc, riboflavin, folate, vitamins C, A, E and K.                                                                           |
| 9-13            | 14 | Male            | Dietary fibre, phosphorus, zinc, riboflavin, niacin, folate, vitamins C, A, E and K.                                                                               |
| 14-18           | 32 | Female          | Dietary fibre, magnesium, phosphorous, iron, zinc, thiamine, riboflavin, niacin, folate, vitamins C, A, E and K.                                                   |
| 14-18           | 18 | Male            | Total protein, dietary fibre, magnesium, phosphorous, iron, zinc, thiamine, riboflavin, niacin, folate, vitamins B <sub>6</sub> , B <sub>12</sub> , C, A, E and K. |
| 19-30           | 67 | Female          | Dietary fibre, magnesium, iron, zinc, thiamine, riboflavin, folate, vitamins B <sub>6</sub> , B <sub>12</sub> , C, A, E and K.                                     |
| 19-30           | 43 | Male            | Dietary fibre, magnesium, zinc, thiamine, riboflavin, niacin, folate, vitamins B <sub>6</sub> , B <sub>12</sub> , C, A, E and K.                                   |
| 31-50           | 62 | Female          | Dietary fibre, magnesium, iron, riboflavin, folate, vitamins B <sub>6</sub> , B <sub>12</sub> , C, A, E and K.                                                     |
| 31-50           | 32 | Male            | Dietary fibre, magnesium, phosphorous, zinc, thiamine, riboflavin, folate, vitamins B <sub>6</sub> , B <sub>12</sub> , C, A, E and K.                              |
| 51-70           | 51 | Female          | Dietary fibre, magnesium, iron, zinc, thiamine, riboflavin, niacin, folate, vitamins B <sub>6</sub> , B <sub>12</sub> , C, A, E and K.                             |
| 51-70           | 20 | Male            | Dietary fibre, magnesium, iron, zinc, thiamine, riboflavin, folate, vitamins B <sub>6</sub> , B <sub>12</sub> , C, A, E and K.                                     |
| Above 70        | 10 | Female          | Dietary fibre, magnesium, iron, zinc, thiamine, riboflavin, niacin, folate, vitamins B <sub>6</sub> , B <sub>12</sub> , C, A and E.                                |
| Above 70        | 5  | Male            | Total protein, dietary fibre, magnesium, iron, zinc, thiamine, riboflavin, folate, vitamins B <sub>6</sub> , B <sub>12</sub> , C, A, E and K.                      |

**Table S4.** Results of the food frequency analysis<sup>1</sup>

| Food Item                  | Never/ less than once a month |      | 1-3 times per month |      | Once a week |      | 2-4 times per week |      | 5-6 times per week |      | 7 times per week |     | 2-3 times per day |     | 4-5 times per day |     | >6 times per day |     |
|----------------------------|-------------------------------|------|---------------------|------|-------------|------|--------------------|------|--------------------|------|------------------|-----|-------------------|-----|-------------------|-----|------------------|-----|
|                            | n                             | %    | n                   | %    | n           | %    | n                  | %    | n                  | %    | n                | %   | n                 | %   | n                 | %   | n                | %   |
| <b>Cereals and grains</b>  |                               |      |                     |      |             |      |                    |      |                    |      |                  |     |                   |     |                   |     |                  |     |
| Cornflakes                 | 71                            | 44.4 | 20                  | 12.5 | 19          | 11.9 | 29                 | 18.1 | 4                  | 2.5  | 15               | 9.4 | 1                 | 0.6 | 1                 | 0.6 | 0                | 0.0 |
| Future life                | 106                           | 74.1 | 16                  | 11.2 | 11          | 7.7  | 4                  | 2.8  | 2                  | 1.4  | 3                | 2.1 | 1                 | 0.7 | 0                 | 0.0 | 0                | 0.0 |
| Mageu                      | 57                            | 35.8 | 20                  | 12.6 | 24          | 15.1 | 31                 | 19.5 | 16                 | 10.1 | 5                | 3.1 | 4                 | 2.5 | 1                 | 0.6 | 1                | 0.6 |
| Maize meal, stiff          | 47                            | 29.7 | 16                  | 10.1 | 35          | 22.2 | 36                 | 22.8 | 12                 | 7.6  | 9                | 5.7 | 3                 | 1.9 | 0                 | 0.0 | 0                | 0.0 |
| Maize meal porridge        | 62                            | 39.5 | 30                  | 19.1 | 27          | 17.2 | 24                 | 15.3 | 8                  | 5.1  | 3                | 1.9 | 3                 | 1.9 | 0                 | 0.0 | 0                | 0.0 |
| Maltabella                 | 116                           | 73.9 | 14                  | 8.9  | 9           | 5.7  | 10                 | 6.4  | 2                  | 1.3  | 6                | 3.8 | 0                 | 0.0 | 0                 | 0.0 | 0                | 0.0 |
| Oats                       | 130                           | 82.8 | 6                   | 3.8  | 13          | 8.3  | 6                  | 3.8  | 1                  | 0.6  | 1                | 0.6 | 0                 | 0.0 | 0                 | 0.0 | 0                | 0.0 |
| Pasta                      | 107                           | 66.9 | 12                  | 7.5  | 5           | 3.1  | 17                 | 10.6 | 13                 | 8.1  | 4                | 2.5 | 2                 | 1.3 | 0                 | 0.0 | 0                | 0.0 |
| <i>Phutu</i>               | 42                            | 26.6 | 5                   | 3.2  | 12          | 7.6  | 44                 | 27.8 | 39                 | 24.7 | 2                | 1.3 | 10                | 6.3 | 3                 | 1.9 | 1                | 0.6 |
| Pronutro                   | 136                           | 87.2 | 4                   | 2.6  | 6           | 3.8  | 3                  | 1.9  | 5                  | 3.2  | 0                | 0.0 | 2                 | 1.3 | 0                 | 0.0 | 0                | 0.0 |
| Rice, brown                | 108                           | 68.4 | 4                   | 2.5  | 6           | 3.8  | 27                 | 17.1 | 10                 | 6.3  | 1                | 0.6 | 0                 | 0.0 | 1                 | 0.6 | 1                | 0.6 |
| Rice, white                | 37                            | 23.7 | 17                  | 10.9 | 26          | 16.7 | 52                 | 33.3 | 15                 | 9.6  | 4                | 2.6 | 4                 | 2.6 | 1                 | 0.6 | 0                | 0.0 |
| Samp and beans             | 50                            | 31.3 | 43                  | 26.9 | 43          | 26.9 | 15                 | 9.4  | 3                  | 1.9  | 4                | 2.5 | 1                 | 0.6 | 1                 | 0.6 | 0                | 0.0 |
| Weetbix                    | 73                            | 47.1 | 13                  | 8.4  | 20          | 12.9 | 23                 | 14.8 | 15                 | 9.7  | 10               | 6.5 | 1                 | 0.6 | 0                 | 0.0 | 0                | 0.0 |
| <b>Bread</b>               |                               |      |                     |      |             |      |                    |      |                    |      |                  |     |                   |     |                   |     |                  |     |
| Brown bread/roll           | 29                            | 20.0 | 21                  | 14.5 | 20          | 13.8 | 42                 | 29.0 | 17                 | 11.7 | 13               | 9.0 | 3                 | 2.1 | 0                 | 0.0 | 0                | 0.0 |
| <i>Ujeqe</i>               | 46                            | 46.5 | 8                   | 8.1  | 21          | 21.2 | 15                 | 15.2 | 8                  | 8.1  | 0                | 0.0 | 1                 | 1.0 | 0                 | 0.0 | 0                | 0.0 |
| White bread/roll           | 45                            | 28.7 | 24                  | 15.3 | 25          | 15.9 | 29                 | 18.5 | 20                 | 12.7 | 12               | 7.6 | 2                 | 1.3 | 0                 | 0.0 | 0                | 0.0 |
| <b>Biscuits and snacks</b> |                               |      |                     |      |             |      |                    |      |                    |      |                  |     |                   |     |                   |     |                  |     |
| Biscuit, filling           | 67                            | 44.7 | 40                  | 26.7 | 26          | 17.3 | 12                 | 8.0  | 2                  | 1.3  | 2                | 1.3 | 1                 | 0.7 | 0                 | 0.0 | 0                | 0.0 |
| Biscuit                    | 71                            | 44.4 | 42                  | 26.3 | 23          | 14.4 | 11                 | 6.9  | 7                  | 4.4  | 4                | 2.5 | 1                 | 0.6 | 0                 | 0.0 | 1                | 0.6 |
| Cream crackers             | 112                           | 70.0 | 27                  | 16.9 | 9           | 5.6  | 5                  | 3.1  | 2                  | 1.3  | 2                | 1.3 | 2                 | 1.3 | 0                 | 0.0 | 1                | 0.6 |
| <b>Starchy vegetables</b>  |                               |      |                     |      |             |      |                    |      |                    |      |                  |     |                   |     |                   |     |                  |     |

<sup>1</sup> The researcher had prior knowledge that bambara groundnut was unfamiliar and not commonly consumed by the individuals residing in the study sites investigated. However, this is a limitation to the study and bambara groundnut should have been included in the FFQ.

**Table S4.** Results of the food frequency analysis continued

|                                                | Never/ less than once a month |      | 1-3 times per month |      | Once a week |      | 2-4 times per week |      | 5-6 times per week |     | 7 times per week |     | 2-3 times per day |     | 4-5 times per day |     | >6 times per day |     |
|------------------------------------------------|-------------------------------|------|---------------------|------|-------------|------|--------------------|------|--------------------|-----|------------------|-----|-------------------|-----|-------------------|-----|------------------|-----|
|                                                | n                             | %    | n                   | %    | n           | %    | n                  | %    | n                  | %   | n                | %   | n                 | %   | n                 | %   | n                | %   |
| <i>Amadumbe</i>                                | 52                            | 32.7 | 47                  | 29.6 | 22          | 13.8 | 18                 | 11.3 | 8                  | 5.0 | 4                | 2.5 | 4                 | 2.5 | 1                 | 0.6 | 3                | 1.9 |
| Mealie/corn (on cob)                           | 49                            | 31.4 | 33                  | 21.2 | 28          | 17.9 | 33                 | 21.2 | 4                  | 2.6 | 3                | 1.9 | 6                 | 3.8 | 0                 | 0.0 | 0                | 0.0 |
| Peas, green                                    | 102                           | 65.0 | 22                  | 14.0 | 14          | 8.9  | 14                 | 8.9  | 2                  | 1.3 | 1                | 0.6 | 0                 | 0.0 | 0                 | 0.0 | 1                | 0.6 |
| Potato, mashed, boiled, pumpkin, winter squash | 37                            | 23.3 | 28                  | 17.6 | 35          | 22.0 | 45                 | 28.3 | 7                  | 4.4 | 3                | 1.9 | 3                 | 1.9 | 0                 | 0.0 | 1                | 0.6 |
| Sweet potato                                   | 34                            | 21.7 | 44                  | 28.0 | 41          | 26.1 | 29                 | 18.5 | 5                  | 3.2 | 3                | 1.9 | 1                 | 0.6 | 0                 | 0.0 | 0                | 0.0 |
| <b>Starchy foods prepared with fats</b>        |                               |      |                     |      |             |      |                    |      |                    |     |                  |     |                   |     |                   |     |                  |     |
| Fried chips                                    | 54                            | 34.2 | 31                  | 19.6 | 33          | 20.9 | 28                 | 17.7 | 5                  | 3.2 | 6                | 3.8 | 1                 | 0.6 | 0                 | 0.0 | 0                | 0.0 |
| Instant noodles                                | 82                            | 51.9 | 23                  | 14.6 | 22          | 13.9 | 17                 | 10.8 | 4                  | 2.5 | 6                | 3.8 | 4                 | 2.5 | 0                 | 0.0 | 0                | 0.0 |
| Popcorn with oil                               | 95                            | 60.1 | 31                  | 19.6 | 16          | 10.1 | 14                 | 8.9  | 2                  | 1.3 | 0                | 0.0 | 0                 | 0.0 | 0                 | 0.0 | 0                | 0.0 |
| Scone                                          | 57                            | 35.8 | 57                  | 35.8 | 23          | 14.5 | 12                 | 7.5  | 4                  | 2.5 | 4                | 2.5 | 1                 | 0.6 | 1                 | 0.6 | 0                | 0.0 |
| <i>Vetkoek</i>                                 | 37                            | 25.7 | 54                  | 37.5 | 23          | 16.0 | 17                 | 11.8 | 8                  | 5.6 | 2                | 1.4 | 3                 | 2.1 | 0                 | 0.0 | 0                | 0.0 |
| <b>Fruit</b>                                   |                               |      |                     |      |             |      |                    |      |                    |     |                  |     |                   |     |                   |     |                  |     |
| Apple, unpeeled medium                         | 29                            | 18.2 | 38                  | 23.9 | 30          | 18.9 | 35                 | 22.0 | 7                  | 4.4 | 12               | 7.5 | 8                 | 5.0 | 0                 | 0.0 | 0                | 0.0 |
| Banana, small                                  | 37                            | 23.4 | 26                  | 16.5 | 49          | 31.0 | 29                 | 18.4 | 8                  | 5.1 | 7                | 4.4 | 2                 | 1.3 | 0                 | 0.0 | 0                | 0.0 |
| Canned fruit                                   | 75                            | 47.2 | 46                  | 28.9 | 15          | 9.4  | 14                 | 8.8  | 3                  | 1.9 | 4                | 2.5 | 1                 | 0.6 | 0                 | 0.0 | 1                | 0.6 |
| Fruit juice                                    | 58                            | 36.5 | 30                  | 18.9 | 25          | 15.7 | 18                 | 11.3 | 9                  | 5.7 | 9                | 5.7 | 10                | 6.3 | 0                 | 0.0 | 0                | 0.0 |
| Fruit salad, fresh                             | 82                            | 51.6 | 43                  | 27.0 | 20          | 12.6 | 4                  | 2.5  | 3                  | 1.9 | 3                | 1.9 | 2                 | 1.3 | 1                 | 0.6 | 1                | 0.6 |
| Grapes, small                                  | 52                            | 33.1 | 63                  | 40.1 | 21          | 13.4 | 6                  | 3.8  | 4                  | 2.5 | 8                | 5.1 | 2                 | 1.3 | 0                 | 0.0 | 1                | 0.6 |
| Orange                                         | 38                            | 24.4 | 44                  | 28.2 | 31          | 19.9 | 24                 | 15.4 | 4                  | 2.6 | 8                | 5.1 | 5                 | 3.2 | 1                 | 0.6 | 1                | 0.6 |
| Pear                                           | 73                            | 46.8 | 40                  | 25.6 | 19          | 12.2 | 15                 | 9.6  | 2                  | 1.3 | 4                | 2.6 | 2                 | 1.3 | 1                 | 0.6 | 0                | 0.0 |
| Guava                                          | 9                             | 81.8 | 1                   | 9.1  | 0           | 0.0  | 0                  | 0.0  | 0                  | 0.0 | 1                | 9.1 | 0                 | 0.0 | 0                 | 0.0 | 0                | 0.0 |
| <b>Milk and milk products</b>                  |                               |      |                     |      |             |      |                    |      |                    |     |                  |     |                   |     |                   |     |                  |     |
| Custard sweetened full cream                   | 98                            | 62.4 | 34                  | 21.7 | 16          | 10.2 | 3                  | 1.9  | 2                  | 1.3 | 2                | 1.3 | 1                 | 0.6 | 1                 | 0.6 | 0                | 0.0 |
| Custard Ultra Mel                              | 70                            | 44.0 | 42                  | 26.4 | 29          | 18.2 | 7                  | 4.4  | 5                  | 3.1 | 4                | 2.5 | 1                 | 0.6 | 1                 | 0.6 | 0                | 0.0 |
| Full cream milk                                | 62                            | 38.8 | 26                  | 16.3 | 14          | 8.8  | 24                 | 15.0 | 13                 | 8.1 | 7                | 4.4 | 9                 | 5.6 | 2                 | 1.3 | 3                | 1.9 |
| Low fat milk                                   | 92                            | 57.5 | 26                  | 16.3 | 10          | 6.3  | 16                 | 10.0 | 8                  | 5.0 | 5                | 3.1 | 2                 | 1.3 | 0                 | 0.0 | 1                | 0.6 |

**Table S4.** Results of the food frequency analysis continued

|                                              | Never/ less than<br>once a month |      | 1-3 times per<br>month |      | Once a<br>week |      | 2-4 times<br>per week |      | 5-6 times<br>per week |      | 7 times<br>per week |     | 2-3 times<br>per day |      | 4-5 times<br>per day |     | >6 times<br>per day |     |
|----------------------------------------------|----------------------------------|------|------------------------|------|----------------|------|-----------------------|------|-----------------------|------|---------------------|-----|----------------------|------|----------------------|-----|---------------------|-----|
|                                              | n                                | %    | n                      | %    | n              | %    | n                     | %    | n                     | %    | n                   | %   | n                    | %    | n                    | %   | n                   | %   |
| <i>Maas</i>                                  | 52                               | 33.3 | 30                     | 19.2 | 24             | 15.4 | 31                    | 19.9 | 8                     | 5.1  | 4                   | 2.6 | 4                    | 2.6  | 0                    | 0.0 | 3                   | 1.9 |
| Yoghurt flavoured                            | 82                               | 52.2 | 34                     | 21.7 | 26             | 16.6 | 9                     | 5.7  | 0                     | 0.0  | 3                   | 1.9 | 2                    | 1.3  | 0                    | 0.0 | 1                   | 0.6 |
| Yoghurt low fat                              | 120                              | 75.9 | 17                     | 10.8 | 11             | 7.0  | 7                     | 4.4  | 2                     | 1.3  | 1                   | 0.6 | 0                    | 0.0  | 0                    | 0.0 | 0                   | 0.0 |
| Yoghurt plain                                | 123                              | 77.8 | 20                     | 12.7 | 12             | 7.6  | 1                     | 0.6  | 1                     | 0.6  | 1                   | 0.6 | 0                    | 0.0  | 0                    | 0.0 | 0                   | 0.0 |
| <b>Vegetables</b>                            |                                  |      |                        |      |                |      |                       |      |                       |      |                     |     |                      |      |                      |     |                     |     |
| Beans, green                                 | 97                               | 61.4 | 17                     | 10.8 | 29             | 18.4 | 14                    | 8.9  | 0                     | 0.0  | 1                   | 0.6 | 0                    | 0.0  | 0                    | 0.0 | 0                   | 0.0 |
| Beetroot                                     | 73                               | 46.8 | 36                     | 23.1 | 29             | 18.6 | 9                     | 5.8  | 6                     | 3.8  | 0                   | 0.0 | 2                    | 1.3  | 0                    | 0.0 | 1                   | 0.6 |
| Broccoli                                     | 113                              | 71.1 | 18                     | 11.3 | 15             | 9.4  | 9                     | 5.7  | 3                     | 1.9  | 0                   | 0.0 | 1                    | 0.6  | 0                    | 0.0 | 0                   | 0.0 |
| Cabbage                                      | 47                               | 29.2 | 24                     | 14.9 | 44             | 27.3 | 31                    | 19.3 | 11                    | 6.8  | 2                   | 1.2 | 2                    | 1.2  | 0                    | 0.0 | 0                   | 0.0 |
| Cauliflower                                  | 132                              | 82.5 | 11                     | 6.9  | 10             | 6.3  | 4                     | 2.5  | 0                     | 0.0  | 3                   | 1.9 | 0                    | 0.0  | 0                    | 0.0 | 0                   | 0.0 |
| <i>Imifino</i> (Indigenous leafy vegetables) | 10                               | 43.5 | 4                      | 17.4 | 4              | 17.4 | 5                     | 21.7 | 0                     | 0.0  | 0                   | 0.0 | 0                    | 0.0  | 0                    | 0.0 | 0                   | 0.0 |
| Lettuce                                      | 104                              | 65.0 | 19                     | 11.9 | 16             | 10.0 | 8                     | 5.0  | 6                     | 3.8  | 1                   | 0.6 | 5                    | 3.1  | 1                    | 0.6 | 0                   | 0.0 |
| Mixed vegetable                              | 68                               | 42.5 | 15                     | 9.4  | 15             | 9.4  | 26                    | 16.3 | 17                    | 10.6 | 7                   | 4.4 | 11                   | 6.9  | 0                    | 0.0 | 1                   | 0.6 |
| Mushroom                                     | 116                              | 73.4 | 19                     | 12.0 | 7              | 4.4  | 9                     | 5.7  | 3                     | 1.9  | 2                   | 1.3 | 1                    | 0.6  | 0                    | 0.0 | 1                   | 0.6 |
| Peppers                                      | 72                               | 45.3 | 12                     | 7.5  | 10             | 6.3  | 14                    | 8.8  | 30                    | 18.9 | 8                   | 5.0 | 8                    | 5.0  | 2                    | 1.3 | 3                   | 1.9 |
| Onions                                       | 25                               | 15.7 | 18                     | 11.3 | 11             | 6.9  | 16                    | 10.1 | 54                    | 34.0 | 8                   | 5.0 | 16                   | 10.1 | 2                    | 1.3 | 9                   | 5.7 |
| Spinach                                      | 34                               | 21.9 | 38                     | 24.5 | 41             | 26.5 | 25                    | 16.1 | 9                     | 5.8  | 2                   | 1.3 | 3                    | 1.9  | 1                    | 0.6 | 2                   | 1.3 |
| Tomato                                       | 26                               | 16.6 | 29                     | 18.5 | 27             | 17.2 | 43                    | 27.4 | 20                    | 12.7 | 6                   | 3.8 | 4                    | 2.5  | 2                    | 1.3 | 0                   | 0.0 |
| <b>Meat and meat substitutes</b>             |                                  |      |                        |      |                |      |                       |      |                       |      |                     |     |                      |      |                      |     |                     |     |
| Baked beans                                  | 56                               | 35.0 | 27                     | 16.9 | 37             | 23.1 | 30                    | 18.8 | 3                     | 1.9  | 5                   | 3.1 | 0                    | 0.0  | 0                    | 0.0 | 1                   | 0.6 |
| Beans, lentils and peas                      | 87                               | 54.4 | 31                     | 19.4 | 26             | 16.3 | 12                    | 7.5  | 1                     | 0.6  | 1                   | 0.6 | 2                    | 1.3  | 0                    | 0.0 | 0                   | 0.0 |
| Bean salad, no oil                           | 85                               | 53.5 | 28                     | 17.6 | 37             | 23.3 | 7                     | 4.4  | 0                     | 0.0  | 0                   | 0.0 | 2                    | 1.3  | 0                    | 0.0 | 0                   | 0.0 |
| Beef, cuts                                   | 46                               | 28.6 | 35                     | 21.7 | 41             | 25.5 | 26                    | 16.1 | 6                     | 3.7  | 6                   | 3.7 | 1                    | 0.6  | 0                    | 0.0 | 0                   | 0.0 |
| Beef, mince                                  | 84                               | 52.8 | 34                     | 21.4 | 26             | 16.4 | 12                    | 7.5  | 2                     | 1.3  | 0                   | 0.0 | 0                    | 0.0  | 0                    | 0.0 | 1                   | 0.6 |
| Beef, patty                                  | 90                               | 57.0 | 20                     | 12.7 | 36             | 22.8 | 7                     | 4.4  | 2                     | 1.3  | 1                   | 0.6 | 1                    | 0.6  | 0                    | 0.0 | 1                   | 0.6 |
| Beef sausage                                 | 57                               | 35.6 | 32                     | 20.0 | 35             | 21.9 | 26                    | 16.3 | 7                     | 4.4  | 3                   | 1.9 | 0                    | 0.0  | 0                    | 0.0 | 0                   | 0.0 |
| Cheese, cheddar                              | 69                               | 43.1 | 26                     | 16.3 | 19             | 11.9 | 32                    | 20.0 | 8                     | 5.0  | 3                   | 1.9 | 2                    | 1.3  | 0                    | 0.0 | 1                   | 0.6 |

**Table S4.** Results of the food frequency analysis continued

|                                   | Never/ less than<br>once a month |      | 1-3 times per<br>month |      | Once a<br>week |      | 2-4 times<br>per week |      | 5-6 times<br>per week |      | 7 times<br>per week |     | 2-3 times<br>per day |     | 4-5 times<br>per day |      | >6 times<br>per day |     |
|-----------------------------------|----------------------------------|------|------------------------|------|----------------|------|-----------------------|------|-----------------------|------|---------------------|-----|----------------------|-----|----------------------|------|---------------------|-----|
|                                   | n                                | %    | n                      | %    | n              | %    | n                     | %    | n                     | %    | n                   | %   | n                    | %   | n                    | %    | n                   | %   |
| Chicken, cooked                   | 22                               | 13.7 | 29                     | 18.0 | 47             | 29.2 | 49                    | 30.4 | 11                    | 6.8  | 1                   | .6  | 2                    | 1.2 | 0                    | 0.0  | 0                   | 0.0 |
| Chicken, stewed                   | 30                               | 18.9 | 22                     | 13.8 | 44             | 27.7 | 40                    | 25.2 | 14                    | 8.8  | 6                   | 3.8 | 2                    | 1.3 | 1                    | 0.6  | 0                   | 0.0 |
| Chicken, feet                     | 38                               | 23.9 | 44                     | 27.7 | 28             | 17.6 | 37                    | 23.3 | 6                     | 3.8  | 2                   | 1.3 | 3                    | 1.9 | 1                    | 0.6  | 0                   | 0.0 |
| Eggs                              | 48                               | 30.4 | 21                     | 13.3 | 16             | 10.1 | 35                    | 22.2 | 22                    | 13.9 | 10                  | 6.3 | 4                    | 2.5 | 1                    | 0.6  | 1                   | 0.6 |
| Fish, hake                        | 99                               | 62.7 | 28                     | 17.7 | 15             | 9.5  | 10                    | 6.3  | 4                     | 2.5  | 1                   | 0.6 | 1                    | 0.6 | 0                    | 0.0  | 0                   | 0.0 |
| Fish, tuna                        | 114                              | 73.1 | 12                     | 7.7  | 11             | 7.1  | 13                    | 8.3  | 4                     | 2.6  | 2                   | 1.3 | 0                    | 0.0 | 0                    | 0.0  | 0                   | 0.0 |
| Lentils                           | 134                              | 84.3 | 13                     | 8.2  | 5              | 3.1  | 3                     | 1.9  | 2                     | 1.3  | 2                   | 1.3 | 0                    | 0.0 | 0                    | 0.0  | 0                   | 0.0 |
| Organ meat (liver, kidney, heart) | 48                               | 29.8 | 65                     | 40.4 | 27             | 16.8 | 13                    | 8.1  | 4                     | 2.5  | 2                   | 1.2 | 0                    | 0.0 | 2                    | 1.2% | 0                   | .0% |
| Peanut butter                     | 81                               | 50.3 | 21                     | 13.0 | 22             | 13.7 | 22                    | 13.7 | 4                     | 2.5  | 7                   | 4.3 | 2                    | 1.2 | 0                    | 0.0  | 2                   | 1.2 |
| Pilchards, canned                 | 60                               | 37.3 | 27                     | 16.8 | 36             | 22.4 | 28                    | 17.4 | 6                     | 3.7  | 1                   | 0.6 | 2                    | 1.2 | 1                    | 0.6  | 0                   | 0.0 |
| Polony                            | 45                               | 28.3 | 30                     | 18.9 | 29             | 18.2 | 22                    | 13.8 | 22                    | 13.8 | 10                  | 6.3 | 1                    | 0.6 | 0                    | 0.0  | 0                   | 0.0 |
| Pork, bacon                       | 112                              | 70.0 | 20                     | 12.5 | 13             | 8.1  | 10                    | 6.3  | 2                     | 1.3  | 1                   | 0.6 | 2                    | 1.3 | 0                    | 0.0  | 0                   | 0.0 |
| Pork, ham                         | 121                              | 76.6 | 16                     | 10.1 | 7              | 4.4  | 5                     | 3.2  | 7                     | 4.4  | 2                   | 1.3 | 0                    | 0.0 | 0                    | 0.0  | 0                   | 0.0 |
| Pork, sausages                    | 126                              | 78.3 | 18                     | 11.2 | 7              | 4.3  | 6                     | 3.7  | 2                     | 1.2  | 1                   | 0.6 | 0                    | 0.0 | 0                    | 0.0  | 1                   | 0.6 |
| Viennas                           | 79                               | 49.7 | 34                     | 21.4 | 23             | 14.5 | 16                    | 10.1 | 4                     | 2.5  | 3                   | 1.9 | 0                    | 0.0 | 0                    | 0.0  | 0                   | 0.0 |
| <b>Fats</b>                       |                                  |      |                        |      |                |      |                       |      |                       |      |                     |     |                      |     |                      |      |                     |     |
| Avocado, medium                   | 72                               | 45.9 | 33                     | 21.0 | 15             | 9.6  | 20                    | 12.7 | 7                     | 4.5  | 7                   | 4.5 | 3                    | 1.9 | 0                    | 0.0  | 0                   | 0.0 |
| Holsum                            | 110                              | 69.2 | 19                     | 11.9 | 10             | 6.3  | 9                     | 5.7  | 8                     | 5.0  | 3                   | 1.9 | 0                    | 0.0 | 0                    | 0.0  | 0                   | 0.0 |
| Margarine, brick                  | 83                               | 51.9 | 19                     | 11.9 | 6              | 3.8  | 15                    | 9.4  | 18                    | 11.3 | 12                  | 7.5 | 6                    | 3.8 | 1                    | 0.6  | 0                   | 0.0 |
| Margarine, tub                    | 89                               | 56.0 | 22                     | 13.8 | 7              | 4.4  | 21                    | 13.2 | 12                    | 7.5  | 5                   | 3.1 | 2                    | 1.3 | 0                    | 0.0  | 1                   | 0.6 |
| Mayonnaise                        | 44                               | 27.7 | 22                     | 13.8 | 20             | 12.6 | 31                    | 19.5 | 24                    | 15.1 | 6                   | 3.8 | 7                    | 4.4 | 1                    | 0.6  | 4                   | 2.5 |
| Oil                               | 37                               | 23.7 | 20                     | 12.8 | 4              | 2.6  | 10                    | 6.4  | 45                    | 28.8 | 14                  | 9.0 | 15                   | 9.6 | 3                    | 1.9  | 7                   | 4.5 |
| <b>Other carbohydrates</b>        |                                  |      |                        |      |                |      |                       |      |                       |      |                     |     |                      |     |                      |      |                     |     |
| Cake, icing                       | 90                               | 55.9 | 42                     | 26.1 | 13             | 8.1  | 7                     | 4.3  | 4                     | 2.5  | 4                   | 2.5 | 0                    | 0.0 | 0                    | 0.0  | 1                   | 0.6 |
| Cake, plain                       | 69                               | 43.1 | 52                     | 32.5 | 15             | 9.4  | 10                    | 6.3  | 6                     | 3.8  | 2                   | 1.3 | 4                    | 2.5 | 0                    | 0.0  | 2                   | 1.3 |
| Chocolate                         | 76                               | 47.5 | 46                     | 28.8 | 22             | 13.8 | 11                    | 6.9  | 1                     | 0.6  | 3                   | 1.9 | 0                    | 0.0 | 1                    | 0.6  | 0                   | 0.0 |
| Cupcake                           | 95                               | 59.7 | 35                     | 22.0 | 15             | 9.4  | 9                     | 5.7  | 3                     | 1.9  | 2                   | 1.3 | 0                    | 0.0 | 0                    | 0.0  | 0                   | 0.0 |

**Table S4.** Results of the food frequency analysis continued

|               | Never/ less than<br>once a month |      | 1-3 times per<br>month |      | Once a<br>week |      | 2-4 times<br>per week |      | 5-6 times<br>per week |      | 7 times<br>per week |     | 2-3 times<br>per day |     | 4-5 times<br>per day |     | >6 times<br>per day |     |
|---------------|----------------------------------|------|------------------------|------|----------------|------|-----------------------|------|-----------------------|------|---------------------|-----|----------------------|-----|----------------------|-----|---------------------|-----|
|               | n                                | %    | n                      | %    | n              | %    | n                     | %    | n                     | %    | n                   | %   | n                    | %   | n                    | %   | n                   | %   |
| Chips (Simba) | 45                               | 28.8 | 40                     | 25.6 | 25             | 16.0 | 29                    | 18.6 | 8                     | 5.1  | 6                   | 3.8 | 3                    | 1.9 | 0                    | 0.0 | 0                   | 0.0 |
| Sweets        | 33                               | 21.9 | 28                     | 18.5 | 21             | 13.9 | 30                    | 19.9 | 21                    | 13.9 | 5                   | 3.3 | 7                    | 4.6 | 4                    | 2.6 | 2                   | 1.3 |



**Table S5.** The mean frequency scores for commonly consumed food items

| Food items                | n <sup>2</sup> | Mean <sup>3</sup> | Food items                                | n   | Mean | Food items                                         | n   | Mean |
|---------------------------|----------------|-------------------|-------------------------------------------|-----|------|----------------------------------------------------|-----|------|
| Oil                       | 156            | 3.37              | <i>Mageu</i> <sup>4</sup>                 | 159 | 1.82 | Beef, sausage                                      | 160 | 1.39 |
| Onions                    | 159            | 3.31              | Orange                                    | 156 | 1.79 | Samp and beans                                     | 160 | 1.37 |
| <i>Phutu</i> <sup>5</sup> | 158            | 2.63              | <i>Maas</i> <sup>6</sup>                  | 156 | 1.74 | Steamed bread ( <i>Ujeqe</i> )                     | 99  | 1.34 |
| Sweets                    | 151            | 2.35              | Fruit juice                               | 159 | 1.73 | Peanut butter                                      | 161 | 1.30 |
| Brown bread/roll          | 145            | 2.33              | Chicken, feet                             | 159 | 1.70 | Avocado, medium                                    | 157 | 1.30 |
| Tomato                    | 157            | 2.29              | Cabbage                                   | 161 | 1.68 | Grapes, small                                      | 157 | 1.27 |
| Mayonnaise                | 159            | 2.28              | Potato crisps                             | 156 | 1.65 | Organ meat (liver, kidney, heart)                  | 161 | 1.23 |
| Rice, white               | 156            | 2.15              | Mealie/corn (on cob)                      | 156 | 1.63 | <i>Isijingi</i> <sup>7</sup>                       | 24  | 1.21 |
| Apple, unpeeled medium    | 159            | 2.13              | Baked beans                               | 160 | 1.61 | Margarine, tub                                     | 159 | 1.21 |
| Eggs                      | 158            | 2.12              | Sweet potato                              | 157 | 1.62 | Instant noodles                                    | 158 | 1.19 |
| Chicken, stewed           | 159            | 2.11              | Squash, butternut, pumpkin, winter squash | 159 | 1.59 | Scone                                              | 159 | 1.18 |
| Chicken, cooked           | 161            | 2.06              | <i>Amadumbe</i> <sup>8</sup>              | 159 | 1.58 | <i>Imifino</i> (Indigenous green leafy vegetables) | 23  | 1.17 |
| Pepper                    | 159            | 2.01              | Beef, cuts                                | 161 | 1.58 | Cake, plain                                        | 160 | 1.16 |
| White bread/roll          | 157            | 1.99              | Margarine, brick                          | 160 | 1.57 | Biscuit                                            | 160 | 1.14 |
| Maize meal porridge       | 158            | 1.93              | Cornflakes                                | 160 | 1.56 | Ice cream                                          | 158 | 1.09 |
| Full cream milk           | 160            | 1.91              | Weetbix                                   | 155 | 1.54 | Custard Ultra Mel                                  | 159 | 1.09 |
| Potato, pumpkin           | 159            | 1.90              | Fried chips                               | 158 | 1.50 | Pear                                               | 156 | 1.09 |
| Mixed vegetable           | 160            | 1.88              | Vetkoek ( <i>amagwinya</i> ) <sup>9</sup> | 144 | 1.47 | Low fat milk                                       | 160 | 1.07 |
| Polony                    | 159            | 1.87              | Pilchards, canned                         | 161 | 1.43 | Beetroot                                           | 156 | 1.06 |
| Banana, small             | 158            | 1.84              | Cheese, cheddar                           | 160 | 1.42 | Canned fruit                                       | 159 | 1.03 |
| Spinach                   | 155            | 1.82              | Maize meal, stiff                         | 157 | 1.41 | Biscuit, filling                                   | 150 | 1.01 |

<sup>2</sup> n: Indicates the number of households that consumed that particular food item.

<sup>3</sup> The mean is expressed as an average score.

<sup>4</sup> *Mageu*: fermented maize meal.

<sup>5</sup> *Phutu*: maize meal cooked into a crumbly porridge.

<sup>6</sup> *Maas*: fermented milk product.

<sup>7</sup> *Isijingi*: soft porridge made with pumpkin.

<sup>8</sup> *Amadumbe*: a tuber that grows underground.

<sup>9</sup> *Amagwinya*: traditional fried bread made with flour, yeast, sugar and salt.

**Table S5.** The mean frequency scores for commonly consumed food items continued

| Food items                       | n   | Mean | Food items                    | n   | Mean | Food items      | n   | Mean |
|----------------------------------|-----|------|-------------------------------|-----|------|-----------------|-----|------|
| Viennas                          | 159 | 1.00 | Beans, green                  | 158 | 0.77 | Future life     | 143 | 0.55 |
| Rice, brown                      | 158 | 0.99 | Fish, hake                    | 158 | 0.73 | Guava           | 11  | 0.55 |
| Pasta                            | 160 | 0.98 | Cupcake                       | 159 | 0.72 | Pork, ham       | 158 | 0.53 |
| Yoghurt, flavoured               | 157 | 0.94 | Popcorn with oil              | 158 | 0.72 | Yoghurt low fat | 158 | 0.46 |
| Fruit salad, fresh               | 159 | 0.94 | Holsum                        | 159 | 0.71 | Pork sausage    | 161 | 0.44 |
| Chocolate                        | 160 | 0.93 | Custard, sweetened full cream | 157 | 0.68 | Morvite         | 12  | 0.42 |
| Beef, patty                      | 158 | 0.89 | Cucumber                      | 160 | 0.65 | Oats            | 157 | 0.38 |
| Lettuce                          | 160 | 0.88 | Maltabella                    | 157 | 0.64 | Pronutro        | 156 | 0.37 |
| Beans, lentils and peas (cooked) | 160 | 0.88 | Fish, tuna                    | 156 | 0.63 | Cauliflower     | 160 | 0.36 |
| Beef mince                       | 159 | 0.87 | Pork, bacon                   | 160 | 0.63 | Yoghurt plain   | 158 | 0.35 |
| Peas, green                      | 157 | 0.86 | Mushroom                      | 158 | 0.61 | Lentils         | 159 | 0.31 |
| Bean salad, no oil               | 159 | 0.85 | Cream crackers                | 160 | 0.61 |                 |     |      |
| Cake, with icing                 | 161 | 0.83 | Broccoli                      | 159 | 0.58 |                 |     |      |
